1 **Short title:** Light and heat stress combination

2 **\*Corresponding author:**

3 Sara I Zandalinas

4 Email: [izquierdozandalins@missouri.edu](mailto:izquierdozandalins@missouri.edu)

5 Bond Life Sciences Center, Division of Plant Sciences, College of Agriculture, Food and Natural  
6 Resources. University of Missouri, Columbia, Missouri, 65211 USA, and Departamento de  
7 Ciencias Agrarias y del Medio Natural, Universitat Jaume I, Castelló de la Plana, 12071 Spain

8 **GABA plays a key role in plant acclimation to a combination**  
9 **of high light and heat stress**

10 Damián Balfagón<sup>1</sup>, Aurelio Gómez-Cadenas<sup>1</sup>, José L. Rambla<sup>1</sup>, Antonio Granell<sup>2</sup>, Carlos de  
11 Ollas<sup>1</sup>, Ron Mittler<sup>3,†</sup>, Sara I Zandalinas<sup>1,3,†,\*</sup>

12 <sup>1</sup>Departamento de Ciencias Agrarias y del Medio Natural, Universitat Jaume I, Castelló de la  
13 Plana, 12071 Spain

14 <sup>2</sup>Instituto de Biología Molecular y Celular de Plantas, CSIC-Universidad Politécnica de Valencia,  
15 Valencia, 46022 Spain

16 <sup>3</sup>Bond Life Sciences Center, Interdisciplinary Plant Group, and Division of Plant Sciences, College  
17 of Agriculture, Food and Natural Resources, University of Missouri, Columbia, Missouri, 65211  
18 USA

19 <sup>†</sup>Senior author

20 **Author Contributions**

21 D.B. and S.I.Z performed the research; S.I.Z., R.M. and A.G-C designed and supervised the  
22 research; R.M. and A.G-C provided laboratory infrastructure and funding; J.L.R., A.G., D.B. and  
23 C.d.O. performed the metabolomics analysis; D.B., S.I.Z. and R.M. wrote the manuscript and  
24 prepared figures. All authors read and approved the final version of the manuscript.

25 **One sentence summary**

26 The non-proteinogenic amino acid  $\gamma$ -aminobutyric acid (GABA) is required for plant acclimation  
27 to a combination of high light and heat stress in Arabidopsis.

## 28 **Funding information**

29 This work was supported by funding from the National Science Foundation (IOS-1353886, MCB-  
30 1936590, and IOS-1932639), the Bond Life Sciences Early Concept Grant, the University of  
31 Missouri, Ministerio de Ciencia e Innovación (Spain, PID2019-104062RB-I00) and Plan GenT  
32 2020 from Generalitat Valenciana (CDEIGENT/2020/013). DB was recipient of a predoctoral  
33 contract funded by Generalitat Valenciana (FEDEGENT/2018/001). JLR was supported by the  
34 Spanish Ministry of Economy and Competitiveness through a “Juan de la Cierva-Formación” grant  
35 (FJCI-2016-28601).

36

## 37 **ABSTRACT**

38 Plants are frequently subjected to different combinations of abiotic stresses, such as high light  
39 intensity and elevated temperatures. These environmental conditions pose an important threat to  
40 agriculture production, affecting photosynthesis and decreasing yield. Metabolic responses of  
41 plants, such as alterations in carbohydrates and amino acid fluxes, play a key role in the successful  
42 acclimation of plants to different abiotic stresses, directing resources towards stress responses and  
43 suppressing growth. Here we show that the primary metabolic response of *Arabidopsis thaliana*  
44 plants to high light or heat stress is different than that of plants subjected to a combination of high  
45 light and heat stress. We further demonstrate that a combination of high light and heat stress results  
46 in a unique metabolic response that includes increased accumulation of sugars and amino acids,  
47 coupled with decreased levels of metabolites participating in the tricarboxylic acid (TCA) cycle.  
48 Among the amino acids exclusively accumulated during a combination of high light and heat  
49 stress, we identified the non-proteinogenic amino acid  $\gamma$ -aminobutyric acid (GABA). Analysis of  
50 different mutants deficient in GABA biosynthesis, in particular two independent alleles of  
51 glutamate decarboxylase 3 (*gad3*), reveal that GABA plays a key role in the acclimation of plants  
52 to a combination of high light and heat stress. Taken together, our findings identify a new role for  
53 GABA in regulating plant responses to stress combination.

## 54 INTRODUCTION

55 Plants growing under natural conditions are exposed to different abiotic and biotic stresses that  
56 impact plant growth and development. Among these, high light intensities that exceed the plant  
57 photosynthetic capacity often occur in native habitats (Ort, 2001; Roeber et al., 2020). Because  
58 light plays a key role in the life of photosynthetic organisms, plants evolved many different  
59 acclimation and adaptation mechanisms to counteract the effect of high light stress, including  
60 paraheliotropic movements, pathways for adjusting the size of the antenna complexes, quenching  
61 mechanisms, and pathways to scavenge excess reactive oxygen species (ROS; Asada, 2006; Li et  
62 al., 2009; Dietz, 2015). The excess excitation energy produced at the antennas of the  
63 photosynthetic apparatus during high light stress is potentially dangerous and could lead to  
64 irreversible damage to the reaction centers. Consequently, a sustained decrease in efficiency and  
65 electron transport rates could occur, leading to photoinhibition (Ruban, 2015). In addition to high  
66 light stress, heat stress can also compromise PSII electron transport due to the increase in fluidity  
67 of the thylakoid membranes, dislodging of PSII light harvesting complexes and decreasing the  
68 integrity of PSII (Mathur et al., 2014). Moreover, because CO<sub>2</sub> fixation is dependent on stomatal  
69 regulation and temperature, high light stress may cause a more severe hazard to plants when  
70 combined with other stresses that already limit the rates of CO<sub>2</sub> fixation (Mittler, 2006; Roeber et  
71 al., 2020). It was recently reported that a combination of high light and heat stress displayed unique  
72 transcriptomic, physiological and hormonal responses in *Arabidopsis thaliana* plants (Balfagón et  
73 al., 2019). In addition, this abiotic stress combination was found to have a severe impact on PSII  
74 performance and to decrease the ability of plants to repair PSII (Balfagón et al., 2019). Lipophilic  
75 antioxidant molecules were previously shown to contribute to the protection of PSII against  
76 photodamage and enhance tolerance of tomato plants to high light and heat stress combination  
77 (Spicher et al., 2017). In sunflower, changes in the steady-state level of transcripts associated with  
78 energy metabolism were found in response to this stress combination (Hewezi et al., 2008). The  
79 specific physiological and molecular responses observed in different plant species in response to  
80 a combination of high light and heat stress (Hewezi et al., 2008; Spicher et al., 2017; Balfagón et  
81 al., 2019), could in turn lead to changes in plant metabolism that would minimize stress-induced  
82 damages (Balfagón et al., 2020).

83 Metabolites play an essential role in plant growth and development, as well as modulate different  
84 environmental responses of plants. The plant metabolome consists of a wide variety of low  
85 molecular weight compounds with many different biological functions, such as carbohydrates that  
86 are direct products of photosynthesis and substrates of energy metabolism; tricarboxylic acid  
87 (TCA) cycle intermediates; and amino acids involved in protein synthesis and/or other cellular  
88 processes such as osmotic readjustments. Increased levels of different polar compounds in plants  
89 subjected to different abiotic stresses, including drought, salinity, high light, and extreme  
90 temperatures, are thought to play a key role in plant acclimation (Kaplan et al., 2004; Cramer et  
91 al., 2007; Maruyama et al., 2009; Caldana et al., 2011). For example, under osmotic stress, TCA  
92 cycle, gluconeogenesis and photorespiration are activated to increase glucose, malate and proline  
93 levels in order to cope with ROS production and photoinhibition (Cramer et al., 2007). A  
94 comparative metabolite analysis of Arabidopsis plants responding to heat or cold shock suggested  
95 that a metabolic network consisting of proline, monosaccharides (glucose and fructose), galactinol  
96 and raffinose has an important role in tolerance to temperature stress (Kaplan et al., 2004; Urano  
97 et al., 2010). Rizhsky et al. (2004) reported that different sugars and amino acids could play a key  
98 role in the response of Arabidopsis plants to a combination of drought and heat stress. A study in  
99 citrus plants subjected to a combination of drought and heat stress further revealed that the ability  
100 of a tolerant citrus genotype to retain a high photosynthetic activity and to cope with oxidative  
101 stress was directly linked to its ability to maintain primary metabolic activity (Zandalinas et al.,  
102 2016). Moreover, metabolomic analysis of maize plants subjected to drought, heat, and their  
103 combination revealed a direct relationship between metabolism and grain yield, highlighting the  
104 importance of photorespiration and raffinose family oligosaccharide metabolism for grain yield  
105 under drought conditions (Obata et al., 2015).

106 In general, abiotic stress conditions result in the accumulation of free amino acids in different  
107 plants (*e.g.*, Rizhsky et al., 2004; Lugan et al., 2010; Aleksza et al., 2017; Huang and Jander, 2017;  
108 Batista-Silva et al., 2019). Several amino acids can act as precursors for the synthesis of secondary  
109 metabolites and signaling molecules. For example, polyamines are derived from arginine (Alcázar  
110 et al., 2010), and the plant hormone ethylene is synthesized from methionine (Amir, 2010). In  
111 addition, a wide range of secondary metabolites with different biological functions are derived  
112 from the aromatic amino acids phenylalanine, tyrosine and tryptophan, or from intermediates of  
113 their biosynthesis pathways (Tzin and Galili, 2010).

114 To dissect different primary metabolic responses and to identify promising metabolic markers for  
115 a combination of high light and heat stress in plants, we studied the effect of this stress combination  
116 on the levels of different primary metabolites in *Arabidopsis thaliana* plants. Both high light and  
117 heat stress conditions impacted PSII performance when occurring individually, and their  
118 combination displayed unique transcriptomic and physiological responses in plants (Balfagón et  
119 al., 2019). We therefore hypothesized that this stress combination would have a unique  
120 metabolomic response, leading to the accumulation of metabolites unique to the state of stress  
121 combination. Our findings indicate that the primary metabolic response of *Arabidopsis* plants to a  
122 combination of high light and heat stress is different than that of plants subjected to high light or  
123 heat stress. We further identified  $\gamma$ -aminobutyric acid (GABA) as a metabolite that specifically  
124 accumulates in plants during a combination of high light and heat stress. Using different mutants  
125 deficient in GABA accumulation, we further reveal that GABA plays a key role in the acclimation  
126 of plants to this stress combination.

127

## 128 **RESULTS**

### 129 **Physiological responses of *Arabidopsis* plants to high light, heat stress and their combination**

130 To study the physiological responses of *Arabidopsis* plants to high light, heat stress and their  
131 combination, we subjected wild-type (Col-0) plants to high light intensity ( $600 \mu\text{mol m}^{-2} \text{s}^{-1}$ ; HL),  
132 high temperature ( $42^\circ\text{C}$ ; HS), or to the combination of HL and HS ( $600 \mu\text{mol m}^{-2} \text{s}^{-1}$  and  $42^\circ\text{C}$ ;  
133 HL+HS) for 7 hours. Control (CT) plants were maintained at  $50 \mu\text{mol m}^{-2} \text{s}^{-1}$  and  $23^\circ\text{C}$  during the  
134 entire experimental period (Supplemental Fig. S1; Balfagón et al., 2019). Gas exchange  
135 parameters, including leaf photosynthetic rate (A), transpiration (E) and stomatal conductance (gs),  
136 were determined in *Arabidopsis* plants subjected to HL, HS and HL+HS (Fig. 1). Photosynthesis,  
137 transpiration, and stomatal conductance significantly decreased following the application of HL  
138 compared to CT values. These results are in agreement with previous reports showing stomata to  
139 close during light stress (Devireddy et al., 2018; Balfagón et al., 2019), limiting transpiration and  
140 negatively affecting photosynthetic rates. In contrast, the application of HS increased transpiration  
141 and stomatal conductance, maintaining stomata open to cool down the leaf surface via transpiration  
142 (in agreement with stomatal aperture measurements; Balfagón et al., 2019). However, HS did not

143 affect photosynthesis compared to CT. Interestingly, the HL+HS combination induced a  
144 significant decrease in photosynthesis compared to CT, whereas transpiration and stomatal  
145 conductance dramatically increased by about 8-fold compared to CT, or 4-fold compared to HS  
146 (Fig. 1). These findings demonstrate that although leaf temperature and stomatal aperture were  
147 similar between plants subject to HS or HL+HS (Balfagón et al., 2019), compared to plants  
148 subjected to HS, transpiration and stomatal conductance were much higher in plants subjected to  
149 the stress combination (HL+HS; Fig. 1). Stomatal aperture measurements and transpiration rates  
150 may therefore not always correlate with each other, and it may take higher transpiration rates to  
151 cool a leaf during HL+HS combination, potentially a result of heat generated due to dissipation of  
152 excess light energy by non-photochemical quenching (NPQ) and/or other protective processes  
153 (Czarnecka and Karpiński, 2018; Murchie and Ruban, 2020). Taken together, the results presented  
154 in Fig. 1 suggest that during HL+HS combination, HS-associated transpiration and stomatal  
155 conductance responses prevailed over those induced by HL (stomatal closure), and that reduction  
156 in leaf temperature was more important for plants subjected to HL+HS, than HL-induced stomatal  
157 closure that could minimize water loss (Fig. 1; Balfagón et al., 2019).

## 158 **Metabolomic responses of Arabidopsis plants to high light, heat stress and their combination**

159 To study the accumulation of stress-associated metabolites in Arabidopsis plants subjected to HL,  
160 HS or HL+HS, a gas chromatography-mass spectrometric (GC-MS) analysis of polar compounds  
161 extracted from leaves of plants subjected to the different stresses was performed (Supplemental  
162 Fig. S1). Principal Component Analysis (PCA) revealed that the main source of variation in the  
163 data was due to metabolic changes associated with the stress combination, as the first principal  
164 component, accounting for 56.6% of total variance, was defined by the characteristic profile of  
165 HL+HS samples. In turn, principal component 3, explaining 11.5% of total variation, clearly  
166 separated the samples based on the metabolic profile of plants subjected to HS (Fig. 2A). Analysis  
167 of variance revealed a total of 25 polar metabolites with levels significantly altered in response to  
168 HL (21 and 4 over- and under-accumulated, respectively), levels of 23 metabolites significantly  
169 altered in response to HS (19 and 4 over- and under-accumulated, respectively), and levels of 38  
170 metabolites changed compared to CT under HL+HS (28 and 10 over- and under-accumulated,  
171 respectively) (Fig. 2B; Table 1). Moreover, of the 28 metabolites with levels significantly elevated  
172 in response to HL+HS, 3 metabolites (10.7%) were common with HL-induced metabolites, other

173 3 metabolites (10.7%) were common with HS-induced metabolites, and 7 metabolites (25.0%)  
174 were found to be specifically accumulated in response to HL+HS. Similarly, levels of 1 metabolite  
175 (10.0%) commonly decreased in response to either HL or HS, and levels of 7 metabolites (70.0%)  
176 were reduced in response to HL+HS (Fig. 2B). These results indicated that a substantial portion of  
177 polar metabolites with altered levels in plants subjected to HL+HS was specific for the stress  
178 combination. As shown in Table 1, metabolites that exclusively accumulated in plants in response  
179 to HL+HS were glycerol, succinic acid, GABA, rhamnose, arginine, gluconic acid and tyrosine.  
180 In contrast, levels of threonic acid, urea, fumaric acid, nicotinic acid, citric acid, pyroglutamic acid  
181 and putrescine specifically decreased in response to HL+HS (Table 1).

### 182 **The impact of high light and heat stress combination on sugar metabolism, TCA cycle** 183 **intermediates, and amino acid levels**

184 Further analysis of metabolites involved in glycolysis, TCA cycle and amino acid biosynthesis  
185 during stress combination, was conducted (Fig. 3). The soluble sugars glucose and fructose, as  
186 well as raffinose and maltose strongly accumulated in response to HL+HS whereas their  
187 accumulation, in general, was less pronounced in response to HL or HS. In addition, trehalose and  
188 erythritol accumulated in response to the different treatments and particularly during HL+HS. In  
189 contrast, sucrose, the major form of carbohydrates transported from photosynthetically active  
190 tissues, slightly increased in its level in response to the individual and combined stresses (Fig. 3A;  
191 Table 1; Supplemental Table S1). Analysis of TCA-cycle intermediates revealed that HL+HS  
192 perturbed the TCA cycle and reduced the levels of the TCA-cycle-derived amino acids aspartate  
193 and glutamate. Aromatic amino acids are synthesized in plants through the shikimate pathway. In  
194 our study, levels of tryptophan and phenylalanine significantly increased during HL+HS, whereas  
195 individual stresses had a marginal effect on their accumulation. In addition, tyrosine was also  
196 accumulated under HL+HS combination, while no change in its levels was found under HL or HS.  
197 Amino acids synthesized from pyruvate including alanine, leucine, valine, and isoleucine  
198 significantly accumulated under all stress conditions, although more noticeably under HL+HS  
199 conditions (Fig. 3A; Table 1; Supplemental Table S1). The reduction in aspartate levels under  
200 HL+HS was accompanied by accumulation of asparagine, methionine, threonine, and especially  
201 lysine, whose accumulation was especially high in response to HL+HS (Fig. 3A; Table 1;  
202 Supplemental Table S1). Analysis of the expression of genes encoding for enzymes that participate

203 in different reactions of the TCA cycle revealed different patterns of transcript accumulation  
204 among the individual and combined stresses (Fig. 3B; Supplemental Table S2). In general,  
205 although TCA-related metabolites were suppressed in response to a combination of HL+HS,  
206 expression of transcripts encoding TCA cycle-related enzymes increased in response to the stress  
207 combination (Fig. 3B; Supplemental Table S2), possibly as a response to counteract the low  
208 metabolite accumulation.

### 209 **Impact of a combination of high light and heat stress on glutamate metabolism**

210 Glutamate has a central role in amino acid metabolism in plants, and is also a substrate for the  
211 synthesis of arginine, ornithine, proline, glutamine and GABA (Forde and Lea, 2007). As shown  
212 in Fig. 4A and Supplemental Table S3, the observed decline in glutamate levels in response to  
213 HL+HS was associated with proline, glutamine, and GABA accumulation. In contrast, levels of  
214 arginine and urea, as well as levels of the polyamine putrescine, decreased or did not change in  
215 response to the application of stress (Fig. 4A; Supplemental Table S3). It was reported that under  
216 abiotic stress conditions, oxidation of putrescine contributes to GABA production (Shelp et al.,  
217 2012), suggesting that the specific decrease in putrescine under HL+HS conditions could lead to  
218 GABA accumulation in response to this stress combination. Indeed, as shown in Fig. 4A and  
219 Supplemental Table S3, GABA accumulated exclusively in response to HL+HS. To further dissect  
220 GABA metabolism in plants in response to a combination of HL and HS, we analyzed the  
221 expression of transcripts involved in GABA biosynthesis (*GAD1*, *GAD2*, *GAD3* and *GAD4*) as  
222 well as the expression of transcripts related to GABA catabolism (*POP2* and *ALDH5F1*; using  
223 RNA-Seq data obtain by Balfagón et al., 2019). As shown in Fig. 4B and Supplemental Table S4,  
224 the expression of *GAD1* and especially *GAD3* remarkably increased only in response to HL+HS.  
225 In contrast, expression of *GAD2* was repressed in response to HS and transcript accumulation of  
226 *GAD4* slightly increased in plants subjected to the individual HL or HS treatments. The expression  
227 of *POP2* decreased in response to HL and HL+HS and all stresses reduced the expression of  
228 *ALDH5F1* (Fig. 4B; Supplemental Table S4). The findings presented in Fig. 4 and Supplemental  
229 Table S4 suggest therefore a possible role for GABA in regulating plant responses to HL+HS.

### 230 **Involvement of GABA in plant tolerance to the combination of high light and heat stress**



231 To further study the role of GABA in the response of plants to HL+HS, we analyzed the response  
232 of two independent lines of the GABA-deficient mutant *gad3* (SALK\_138534C and  
233 SALK\_033307C) to HL, HS and HL+HS combination (Fig. 5A). Accumulation of GABA was  
234 repressed or did not change in *gad3* mutants subjected to HL or HS, as well as in wild type plants  
235 in response to HL. In contrast, HL+HS induced a pronounced increase in GABA levels in Col-0  
236 plants, whereas both *gad3* mutants slightly accumulated GABA, probably due to the action of  
237 *GAD1* (Figs. 4B, 5B). The reduced accumulation of GABA in *gad3* plants in response to HL+HS  
238 compared to Col-0 (Fig. 5B) was accompanied by a significant decrease in the survival of *gad3*  
239 mutants in response to a combination of HL+HS (Fig. 5A, C). Whereas all *gad3* plants survived  
240 the individual HL or HS, the survival rate of both *gad3* mutants subjected to HL+HS combination  
241 decreased by about 40%. Furthermore, analysis of Leaf Damage Index (LDI; Balfagón et al., 2019)  
242 of Col-0 and *gad3* mutants subjected to the different stresses (Fig. 5D) revealed that HL+HS  
243 negatively impacted leaf appearance of both *gad3* lines, with 51.2% and 50.2% of leaves dead,  
244 28.2% and 32.7% of leaves injured, and only 20.6% and 16.9% of leaves appearing healthy, in  
245 SALK\_138534C and SALK\_033307C, respectively (Fig. 5D). Compared to Col-0 plants, *gad3*  
246 mutants were therefore more sensitive to HL+HS combination.

247

## 248 **DISCUSSION**

249 The ability of plants to sense and react to different adverse conditions in their environment by  
250 modulating physiological responses, gene expression and metabolism, is crucial for plant  
251 adaptation and survival during stress. Due to the frequent occurrence of HL+HS combination in  
252 nature, and its impact on crops (Yamamoto et al., 2008; Suzuki et al., 2014; Roeber et al., 2020),  
253 as well as its impact on plant survival (Balfagón et al., 2019), the study of metabolic changes  
254 during this stress combination is of particular interest. A recent study of the physiological and  
255 transcriptomic responses of Arabidopsis plants subjected to HL, HS and their combination  
256 (HL+HS) revealed that the HL+HS combination was accompanied by irreversible damage to PSII,  
257 decreased D1 (PsbA) protein levels, enhanced accumulation of the hormones jasmonic acid (JA)  
258 and JA-isoleucine (JA-Ile), elevated expression of over 2,200 different transcripts unique to the  
259 stress combination, distinctive structural changes to chloroplasts and a decreased survival rate

260 (Balfagón et al., 2019). In the present study, we show that HL+HS combination has a detrimental  
261 effect on photosynthetic rates, and that the effects of HS on stomatal responses and transpiration  
262 (opening of stomata and increasing transpiration) prevails over the effects of HL (closing of  
263 stomata and decreasing transpiration; Balfagón et al., 2019) (Fig. 1). This result is different than  
264 the response of plants to a combination of drought and heat stress, in which the effects of drought  
265 prevailed over the effects of heat on stomatal regulation (Rizhsky et al., 2002; Rizhsky et al., 2004).  
266 The observed decrease in photosynthetic rates under HL+HS (Fig. 1) prompted us to analyze the  
267 primary metabolism of plants subjected to this stress combination to unravel specific patterns of  
268 sugar, amino acid and polyamine accumulation (Figs. 2-4; Table 1; Supplemental Tables S1-4).  
269 Individual and combined HL and HS displayed different polar accumulation patterns (Fig. 2; Table  
270 1), suggesting that the different stress conditions alter the primary metabolism in different ways,  
271 reinforcing the idea that metabolic changes due to stress combination are unique and not a mere  
272 additive combination of the effects of each individual stress.

273 In our study, the levels of several metabolites appeared to be correlated with plant sensitivity to  
274 HL+HS combination (Balfagón et al., 2019). Plants subjected to this stress combination  
275 accumulated sugars such as glucose, fructose, raffinose, maltose and trehalose, whereas the levels  
276 of sucrose slightly increased in response to individual and combined stresses (Fig. 3; Table 1;  
277 Supplemental Table S1). The source of sugars in plants subjected to a combination of HL and HS  
278 is unknown. Taking into consideration that photosynthesis is suppressed in plants subjected to  
279 HL+HS combination (Fig. 1), sugars could be synthesized by way of starch degradation, as  
280 proposed to occur during a combination of drought and heat stress (Rizhsky et al., 2004). Indeed,  
281 high accumulation of maltose, a major sugar associated with starch degradation (Thalman and  
282 Santelia, 2017), and of its derived sugars were observed in HL+HS-stressed plants (Fig. 3; Table  
283 1; Supplemental Table S1). Additional studies are, however, required to examine this possibility.  
284 The increased accumulation of sugars participating in glycolysis under HL+HS (Fig. 3;  
285 Supplemental Table S1) suggests that this pathway could provide an alternative source of ATP in  
286 plants subjected to HL+HS stress combination, to counteract the negative effects of the stress  
287 combination on PSII and photosynthetic rates (Fig. 1; Balfagón et al., 2019), as well as to function  
288 as compatible solutes (Krasensky and Jonak, 2012; Shaar-Moshe et al., 2019). Moreover, the levels  
289 of glycolysis-derived aromatic amino acids produced through the shikimate pathway, tryptophan,

290 phenylalanine and tyrosine, as well as amino acids synthesized from pyruvate, including alanine,  
291 leucine, valine and isoleucine significantly increased during a combination of HL+HS (Fig. 3;  
292 Table 1; Supplemental Table S1). Although glycolysis appeared to be activated under HL+HS  
293 combination, a concomitant activation of the TCA cycle was not observed (Fig. 3; Table 1;  
294 Supplemental Table S1), similar to the findings of Shaar-Moshe et al. (2019), demonstrating that  
295 organic acids produced by the TCA cycle were reduced under the combination of salinity, drought  
296 and heat. Therefore, depletion of metabolites related to the TCA cycle under stress combination  
297 could indicate that respiration might be compromised in plants subjected to HL+HS combination.  
298 The reduction in oxalacetate-derived aspartate levels under HL+HS conditions was accompanied  
299 by an increase in aspartate-related amino acids, especially lysine (Fig. 3; Table 1; Supplemental  
300 Table S1). Increased accumulation of amino acids has been shown in plants subjected to different  
301 abiotic stresses (*e.g.*, Kaplan et al., 2004; Rizhsky et al., 2004; Kempa et al., 2008; Sanchez et al.,  
302 2008; Usadel et al., 2008; Lukan et al., 2010; Krasensky and Jonak, 2012), and could be a result  
303 of amino acid biosynthesis and/or enhanced stress-induced protein degradation. In this sense, the  
304 higher impact of HL+HS combination on plant physiology and survival (Fig. 1; Balfagón et al.,  
305 2019) could lead to an increase in protein degradation and therefore, higher amino acid content.  
306 Further studies elucidating this possibility are needed. The decreased levels of TCA-derived  
307 glutamate in response to HL and especially in response to HL+HS combination (Figs. 3, 5; Table  
308 1; Supplemental Table S1) was further accompanied by a concomitant decrease in putrescine (Fig.  
309 4; Table 1; Supplemental Table S3). These results indicate that the role of polyamines under  
310 HL+HS as osmoprotectants might be marginal, and that other metabolites including sugars (Fig.  
311 3) and/or proline (Fig. 4) could have a key role as osmoprotective elements under this stress  
312 combination. In addition, as a compatible solute, proline is involved in the stabilization of proteins  
313 and protein complexes in the chloroplast and cytosol, protection of the photosynthetic apparatus  
314 and enzymes involved in detoxification of ROS, as well as redox balance stabilization (Szabados  
315 and Savouré, 2010). The high accumulation of proline observed in plants subjected to HL+HS  
316 could therefore suggest that the stress combination imposes a stronger pressure on plant  
317 metabolism, as indicated by the decrease in survival rates and values of LDI (Fig. 5; Balfagón et  
318 al., 2019).

319 Interestingly, GABA levels were specifically elevated in plants subjected to HL+HS combination  
320 (Fig. 4A Table 1; Supplemental Table S3), and GABA-deficient mutants (*gad3*) showed a  
321 significant decline in their ability to acclimate to this stress combination (Fig. 5), suggesting that  
322 GABA could be required for plant acclimation to a combination of high light and heat stress.  
323 GABA is a key non-proteinogenic amino acid that displays important physiological functions  
324 involved in plant growth regulation (Seifikalhor et al., 2019). Exogenous GABA application to  
325 plants was reported to improve tolerance to different environmental stresses (*e.g.*, Shi et al., 2010;  
326 Shang et al., 2011; Li et al., 2016; Salvatierra et al., 2016; Priya et al., 2019; Seifikalhor et al.,  
327 2020). Furthermore, GABA levels increased in response to different abiotic stress combinations,  
328 namely, salt and drought, as well as salt, drought and heat (Shaar-Moshe et al., 2019). GABA was  
329 further proposed to act as a signaling molecule during stress (Bouché and Fromm, 2004; Yu et al.,  
330 2014; Fromm, 2020). Another potential function of GABA in plant survival during stress could be  
331 linked to its role in regulating autophagy (Supplemental Fig. S2; Signorelli et al., 2019),  
332 contributing to the recycling of damaged cellular components during stress. Taken together, the  
333 results presented here indicate that GABA plays a key role in the response of plants to HL+HS  
334 stress combination, and that genes involved in GABA metabolism could be used as potential  
335 breeding markers for HL+HS-tolerant crops.

336

## 337 MATERIALS AND METHODS

### 338 Plant material and growth conditions

339 *Arabidopsis thaliana* Col-0 (var. Columbia-0) and *gad3* (SALK\_138534C and SALK\_033307C)  
340 plants were grown in peat pellets (Jiffy-7, <http://www.jiffygroup.com/>) at 23°C under long day  
341 growth conditions (12-hour light from 7 AM to 7 PM; 50  $\mu\text{mol m}^{-2} \text{s}^{-1}$ /12-hour dark from 7 PM to  
342 7 AM).

### 343 Stress treatments

344 Individual HL and HS, and a combination of HL and HS were applied in parallel as described in  
345 (Balfagón et al., 2019) and shown in Supplemental Fig. S1, using 30-day-old *Arabidopsis thaliana*  
346 plants (wild type Col-0 and the SALK\_138534C and SALK\_033307C *gad3* mutants). HL was  
347 applied by exposing plants to 600  $\mu\text{mol m}^{-2} \text{s}^{-1}$  (Philips, F54T5/TL84/HO/ALTO) at 23°C for 7

348 hours. HS was applied by subjecting plants to 42°C, 50  $\mu\text{mol m}^{-2} \text{s}^{-1}$ , for 7 hours. HL+HS  
349 combination was performed by simultaneously subjecting plants to 600  $\mu\text{mol m}^{-2} \text{s}^{-1}$  of light stress  
350 and 42°C for 7 hours. Control plants were maintained at 50  $\mu\text{mol m}^{-2} \text{s}^{-1}$ , 23°C during the entire  
351 experiment. Following the stress treatments, control plants and plants subjected to HL, HS and  
352 HL+HS combination were divided into two groups: a group used for sampling leaves for  
353 metabolomics analysis as described below; and a group allowed to recover under controlled  
354 conditions until flowering time to score for survival. 24 hours following the stress treatments, Leaf  
355 Damage Index (LDI; Gallas and Waters, 2015; Balfagón et al., 2019) was recorded (Supplemental  
356 Fig. S1). All experiments were carried out at the same time-of-day during the light cycle (from 9  
357 AM to 4 PM) and were repeated at least three times with 30 plants per biological repeat.

### 358 **Photosynthetic parameters**

359 Photosynthetic rate (A), transpiration (E) and stomatal conductance (gs) were measured using a  
360 LCpro+ portable infrared gas analyzer (ADC BioScientific Ltd., Hoddesdon, UK) under ambient  
361 CO<sub>2</sub> and moisture conditions. Supplemental light was provided by a PAR lamp at 50 or 600  $\mu\text{mol}$   
362  $\text{m}^{-2} \text{s}^{-1}$  photon flux density, and air flow was set at 150  $\mu\text{mol mol}^{-1}$ . After instrument stabilization,  
363 at least 10 measurements were taken on three fully expanded leaves of three plants immediately  
364 after the 7 hours of individual and combined stress treatments (Supplemental Fig. S1). All  
365 experiments were repeated at least three times.

### 366 **Determination of primary metabolites**

367 The relative levels of polar metabolites were determined as described in Zanor et al. (2009). Fifteen  
368 mg of freeze-dried plant tissue were extracted in 1.4 mL of methanol and 60  $\mu\text{L}$  of an aqueous  
369 solution with 0.2 mg  $\text{mL}^{-1}$  of ribitol, which was used as internal standard. Extraction was  
370 performed at 70°C for 15 min in a water bath. The extract was centrifuged at 14,000 rpm for 10  
371 min, and the supernatant was recovered and fractionated adding chloroform and Milli-Q water.  
372 After vigorous vortexing and 15 min and centrifugation at 4,000 rpm, 50  $\mu\text{L}$  of the aqueous phase  
373 were recovered and dried overnight in a speed-vac. The dry residue was subjected to a double  
374 derivatization procedure with methoxyamine hydrochloride (20 mg  $\text{mL}^{-1}$  in pyridine, Sigma) and  
375 *N*-Methyl-*N*-(trimethylsilyl)trifluoroacetamide (Macherey-Nagel). Fatty acid methyl esters (C<sub>8</sub>-  
376 C<sub>24</sub>) were added and used as retention index (RI) markers. Analyses were performed on a 6890N  
377 gas chromatograph (Agilent Technologies, USA) coupled to a Pegasus 4D TOF mass spectrometer

378 (LECO, St. Joseph, MI). Chromatography was performed with a BPX35 (30 m, 0.32 mm, 0.25  
379  $\mu\text{m}$ ) capillary column (SGE Analytical Science Pty Ltd., Australia) with a  $2\text{ mL min}^{-1}$  helium flow.  
380 Oven programming conditions were as follows: 2 min of isothermal heating at  $85^{\circ}\text{C}$ , followed by  
381 a  $15^{\circ}\text{C min}^{-1}$  temperature ramp up to  $360^{\circ}\text{C}$ . Injection temperature was set at  $230^{\circ}\text{C}$ , and the ion  
382 source was adjusted to  $250^{\circ}\text{C}$ . Data were acquired after EI ionization at 70 eV, and recorded in the  
383 70–600  $m/z$  range at 20 scans  $\text{s}^{-1}$ . Chromatograms were analyzed by means of the ChromaTOF  
384 software. Metabolites were identified by comparison of both mass spectra and retention time with  
385 those of pure standards injected under the same conditions. Peak area of each identified compound  
386 was normalized to the internal standard area (ribitol) and sample dry weight. All experiments were  
387 repeated four times.

### 388 **$\gamma$ -aminobutyric acid quantification**

389 About 5 mg of freeze-dried plant tissue were transferred to a 1.5-mL microcentrifuge tube. Three  
390 glass beads and 50  $\mu\text{L}$  of deuterium labelled internal standard  $\gamma$ -aminobutyric acid (GABA-d2) at  
391 concentration of 20 ppm was added. Then, 300  $\mu\text{L}$  of cold MeOH:H<sub>2</sub>O (80:20) was added,  
392 following sonication in an ultrasound bath with ice for 10 min and centrifugation at 10,000 rpm  
393 for 5 min. 250  $\mu\text{L}$  of supernatant were recovered and 250  $\mu\text{L}$  of acetonitrile were added, following  
394 filtration through a PTFE 0.2  $\mu\text{m}$  pore size cellulose filter. Final concentration of the deuterated  
395 standard (GABA-d2) was 200 ppb. GABA was quantified in plant extracts using a UPLC system  
396 (Waters Acquity SDS, Waters Corp., Milford, MA, USA) interfaced to a TQD triple quadrupole  
397 (Micromass Ltd, Manchester, UK) mass spectrometer through an orthogonal Z-spray electrospray  
398 ion source. Separations were carried out on 2.1 mm  $\times$  150 mm ACQUITY UPLC 1.7 m BEH  
399 amide Column using a linear gradient of (A) acetonitrile-water 95:5 (v:v), 0.1% ammonium  
400 formate and (B) acetonitrile-water 2:98 (v:v), 0.1% ammonium formate at a flow rate of 300  $\mu\text{L}$   
401  $\text{min}^{-1}$ . Chromatographic run started at 0% B; after 1 min a linear gradient increased A to 75% for  
402 3 min; finally, mobile phase composition returned to the initial conditions for 2 min. Transitions  
403 for GABA (104>87) and GABA-d2 (106>89), were monitored in positive ionization mode. GABA  
404 was identified by comparing both mass spectra and retention time with those of pure standards  
405 injected in the same conditions. Peak area of GABA was normalized to internal standard area  
406 (GABA-d2) and sample dry weight. All experiments were repeated at least three times.

### 407 **Statistical analysis**

408 Results are presented as the mean  $\pm$  SD. Statistical analysis were performed by two-way ANOVA  
409 followed by a Tukey post hoc test when a significant difference was detected (different letters  
410 denote statistical significance at  $p < 0.05$ ), or by two-tailed Student's t-test (asterisks denote  
411 statistical significance at  $p < 0.05$ ). Principal component analysis (PCA) was performed by means  
412 of the SIMCA version 13.0.3.0 software, using the  $\log_2$  transformed data and unit variance  
413 normalization.

#### 414 **ACKNOWLEDGMENTS**

415 Metabolite measurements were carried out at Instituto de Biología Molecular y Celular de Plantas,  
416 CSIC-Universidad Politécnica de Valencia, and Servei Central d'Instrumentació Científica of the  
417 Universitat Jaume I.

418

#### 419 **SUPPLEMENTAL MATERIAL**

420 **Table S1.** Levels of metabolites involved in glycolysis, TCA cycle, and amino acid metabolism in  
421 Col-0 plants subjected to high light (HL), heat stress (HS) and the combination of HL and HS  
422 (HL+HS). Metabolite levels are expressed as the fold change compared to control conditions.  
423 *Abbreviations used:* CT, control; HL, high light; HS, heat stress; HL+HS, a combination of high  
424 light and heat stress.

425 **Table S2.** Expression level of transcripts involved in TCA cycle in Col-0 plants subjected to high  
426 light (HL), heat stress (HS) and the combination of HL and HS (HL+HS). Significant transcript  
427 levels ( $p < 0.05$ ) are expressed as the fold change compared to control conditions. Data was  
428 obtained from the RNA-Seq analysis conducted by Balfagón et al. (2019). *Abbreviations used:*  
429 CT, control; HL, high light; HS, heat stress; HL+HS, a combination of high light and heat stress;  
430 n.s., not significant.

431 **Table S3.** Level of metabolites involved in glutamate metabolism in Col-0 plants subjected to high  
432 light (HL), heat stress (HS) and the combination of HL and HS (HL+HS). Metabolite levels are  
433 expressed as the fold change compared to control conditions. *Abbreviations used:* CT, control;  
434 GABA,  $\gamma$ -aminobutyric acid; HL, high light; HS, heat stress; HL+HS, a combination of high light  
435 and heat stress.

436 **Table S4.** Expression level of transcripts involved in GABA metabolism in Col-0 plants subjected  
437 to high light (HL), heat stress (HS) and the combination of HL and HS (HL+HS). Significant  
438 transcript levels ( $p < 0.05$ ) are expressed as the fold change compared to control conditions. Data  
439 was obtained from the RNA-Seq analysis conducted by Balfagón et al. (2019). *Abbreviations used:*  
440 ALDH5F1, aldehyde dehydrogenase 5F1; CT, control; GAD, glutamate decarboxylase; HL, high  
441 light; HS, heat stress; HL+HS, a combination of high light and heat stress; n.s., not significant;  
442 POP2, pollen-pistil incompatibility 2.

443 **Fig. S1.** The experimental design used for the metabolomic study of high light (HL, yellow), heat  
444 stress (HS, orange) and a combination of high light and heat stress (HL+HS, grey) using  
445 Arabidopsis plants. HL was applied by exposing 30-day-old plants to  $600 \mu\text{mol m}^{-2} \text{s}^{-1}$  (Philips,  
446 F54T5/TL84/HO/ALTO) at  $23^{\circ}\text{C}$ . HS was applied by transferring 30-day-old plants to  $42^{\circ}\text{C}$ .  
447 HL+HS was performed by simultaneously subjecting plants to  $600 \mu\text{mol m}^{-2} \text{s}^{-1}$  and  $42^{\circ}\text{C}$ . Stress  
448 treatments were performed in parallel during 7 h. Following the stress treatments, plants were  
449 sampled for metabolomic analysis and gas exchange parameters were recorded. Another group of  
450 plants was allowed to recover under controlled conditions until flowering time to score for  
451 survival. 24 hours following the stress treatments, Leaf Damage Index (LDI) was also determined.  
452 All experiments were carried out at the same time-of-day during the light cycle (from 9 AM to 4  
453 PM) and were repeated at least three times using Col-0 and *gad3* plants. *Abbreviations used:* CT,  
454 control; HL, high light; HS, heat stress; HL+HS, a combination of high light and heat stress; LDI,  
455 Leaf Damage Index.

456 **Fig. S2.** Enrichment of autophagy-related transcripts in the response of Arabidopsis plants to a  
457 combination of high light and heat stress. (A) Venn diagrams depicting the overlap between  
458 transcripts altered in Col-0 plants in response to a combination of high light and heat stress  
459 (HL+HS) and transcripts related to autophagy. (B) Heat map showing the expression levels of  
460 transcripts involved in autophagy in Col-0 plants subjected HL, HS and HL+HS combination.  
461 Non-significant expression levels compared to controls are shown in grey. Data was obtained from  
462 the RNA-Seq analysis conducted by Balfagón et al. (2019). *Abbreviations used:* HL, high light;  
463 HS, heat stress; HL+HS, a combination of high light and heat stress.



464 **TABLES**

465 **Table 1.** List of metabolites over- and under-accumulated in Col-0 plants subjected to high light  
 466 (HL), heat stress (HS) and a combination of HL and HS (HL+HS). Values represent fold changes  
 467 compared to control. Bold values represent fold changes > 10 for over-accumulated metabolites,  
 468 and fold changes < 0.5 for under-accumulated metabolites. Metabolites shown are all significant  
 469 (N=4, t-test, p < 0.05; see Tables S1, S3). *Abbreviations used:* GABA,  $\gamma$ -aminobutyric acid; HL,  
 470 high light; HS, heat stress; HL+HS, a combination of high light and heat stress.

| Stress                             | Metabolite                  | Over-accumulated<br>(Fold change) |               |               | Metabolite    | Under-accumulated<br>(Fold change) |                   |             |
|------------------------------------|-----------------------------|-----------------------------------|---------------|---------------|---------------|------------------------------------|-------------------|-------------|
|                                    |                             | HL                                | HS            | HL+HS         |               | HL                                 | HS                | HL+HS       |
| <b>HL</b>                          | Fumaric acid                | 1.90                              |               |               | GABA          | 0.65                               |                   |             |
|                                    | Malic acid                  | 2.60                              |               |               | Rhamnose      | 0.69                               |                   |             |
|                                    | $\alpha$ -ketoglutaric acid | 2.11                              |               |               |               |                                    |                   |             |
| <b>HL &amp;<br/>HL+HS</b>          | Proline                     | <b>10.35</b>                      |               | <b>27.35</b>  | Glutamic acid | 0.74                               |                   | <b>0.36</b> |
|                                    | Methionine                  | 1.81                              |               | 2.37          |               |                                    |                   |             |
|                                    | Threolose                   | 2.13                              |               | 3.92          |               |                                    |                   |             |
| <b>HS</b>                          | Putrescine                  | 1.49                              |               |               | Methionine    |                                    | 0.64              |             |
|                                    |                             |                                   | Arginine      |               |               |                                    | 0.52              |             |
| <b>HS &amp;<br/>HL+HS</b>          | Asparagine                  |                                   | 3.18          | 2.71          | Myoinositol   |                                    | 0.53              | <b>0.44</b> |
|                                    | Lysine                      |                                   | 2.57          | <b>23.90</b>  |               |                                    |                   |             |
|                                    | Tryptophan                  |                                   | 1.95          | <b>16.72</b>  |               |                                    |                   |             |
| <b>HL+HS</b>                       | Glycerol                    |                                   |               | 2.48          | Threonic acid |                                    |                   | 0.69        |
|                                    | Succinic acid               |                                   |               | 2.33          |               |                                    | Urea              | 0.55        |
|                                    | GABA                        |                                   |               | <b>59.43</b>  |               |                                    | Fumaric acid      | 0.58        |
|                                    | Rhamnose                    |                                   |               | 2.32          |               |                                    | Nicotinic acid    | 0.60        |
|                                    | Arginine                    |                                   |               | 1.31          |               |                                    | Citric acid       | <b>0.47</b> |
|                                    | Gluconic acid               |                                   |               | 2.32          |               |                                    | Pyroglutamic acid | 0.68        |
|                                    | Tyrosine                    |                                   |               | 2.11          |               |                                    | Putrescine        | <b>0.38</b> |
| <b>HL &amp; HS &amp;<br/>HL+HS</b> | Alanine                     | <b>43.61</b>                      | <b>287.70</b> | <b>593.02</b> | Aspartic acid | 0.62                               | 0.61              | <b>0.25</b> |
|                                    | Valine                      | <b>12.35</b>                      | <b>16.14</b>  | <b>73.63</b>  |               |                                    |                   |             |
|                                    | Leucine                     | 7.82                              | 8.10          | <b>174.49</b> |               |                                    |                   |             |
|                                    | Isoleucine                  | 7.41                              | <b>12.56</b>  | <b>148.53</b> |               |                                    |                   |             |
|                                    | Glycine                     | 26.28                             | 9.14          | <b>12.78</b>  |               |                                    |                   |             |
|                                    | Threonine                   | 2.86                              | 2.75          | 3.21          |               |                                    |                   |             |
|                                    | Erythritol                  | 1.48                              | 1.74          | 3.86          |               |                                    |                   |             |
|                                    | 4-hydroxyproline            | 1.54                              | 1.95          | 2.05          |               |                                    |                   |             |
|                                    | Phenylalanine               | 1.78                              | 3.64          | <b>15.04</b>  |               |                                    |                   |             |
|                                    | Glutamine                   | 6.64                              | 3.56          | <b>15.18</b>  |               |                                    |                   |             |
|                                    | Fructose                    | 1.68                              | 1.93          | 7.73          |               |                                    |                   |             |
|                                    | Glucose                     | 2.77                              | 3.31          | 9.42          |               |                                    |                   |             |
|                                    | Sucrose                     | 1.50                              | 2.06          | 1.69          |               |                                    |                   |             |
|                                    | Maltose                     | 3.72                              | 1.83          | <b>50.28</b>  |               |                                    |                   |             |
| Raffinose                          | 3.07                        | <b>42.54</b>                      | <b>31.74</b>  |               |               |                                    |                   |             |

471

## 472 **FIGURE LEGENDS**

473 **Fig. 1.** Physiological measurements of Arabidopsis plants subjected to high light, heat stress and  
474 their combination. Leaf photosynthetic rate (A), transpiration (E), and stomatal conductance (gs)  
475 of Col-0 plants subjected to high light (HL), heat stress (HS) and the combination of HL and HS  
476 (HL+HS). Error bars represent SD (N=9). Different letters denote statistical significance at  $p <$   
477 0.05. *Abbreviations used:* A, photosynthetic rate; E, transpiration; gs, stomatal conductance; CT,  
478 control; HL, high light; HS, heat stress; HL+HS, a combination of high light and heat stress.

479 **Fig. 2.** Metabolic analysis of Arabidopsis Col-0 plants subjected to high light, heat stress and their  
480 combination. (A) Principal Component Analysis (PCA) score plot of metabolite profiles obtained  
481 from control Col-0 plants (CT), and Col-0 plants subjected to high light (HL), heat stress (HS) or  
482 a combination of HL and HS (HL+HS). (B) Venn diagrams showing the overlap between  
483 metabolites over-accumulated (left) or under-accumulated (right) in response to HL, HS and  
484 HL+HS combination. *Abbreviations used:* CT, control; HL, high light; HS, heat stress; HL+HS, a  
485 combination of high light and heat stress.

486 **Fig. 3.** Levels of amino acids and metabolites involved in glycolysis and TCA cycle in Arabidopsis  
487 plants subjected to high light, heat stress and their combination. (A) Levels of metabolites  
488 participating in glycolysis, TCA cycle, and amino acid metabolism in Col-0 plants subjected to  
489 high light (HL), heat stress (HS) or a combination of HL and HS (HL+HS). Significant metabolite  
490 levels ( $p < 0.05$ ) are expressed as fold change compared to control conditions and are shown as a  
491 color scale (Table S1). Non-significant accumulation compared to control is shown in white. (B)  
492 Heat map showing the expression levels of transcripts involved in TCA cycle in Col-0 plants  
493 subjected HL, HS and HL+HS combination. Significant transcript levels ( $p < 0.05$ ) are expressed  
494 as fold change compared to control conditions and are shown as a color scale. Non-significant  
495 expression levels compared to control are shown in grey. Transcript expression data was obtained  
496 from the RNA-Seq analysis conducted by Balfagón et al. (2019) (Table S2). *Abbreviations used:*  
497 HL, high light; HS, heat stress; HL+HS, a combination of high light and heat stress; PEP,  
498 phosphoenolpyruvate.

499 **Fig. 4.** Glutamate metabolism in Arabidopsis plants subjected to high light, heat stress and their  
500 combination. (A) Level of metabolites involved in glutamate metabolism in Col-0 plants subjected  
501 to high light (HL), heat stress (HS) or a combination of HL and HS (HL+HS). Significant

502 metabolite levels ( $p < 0.05$ ) are expressed as fold change compared to control conditions and are  
503 shown as a color scale (Table S3). Non-significant accumulation compared to controls are shown  
504 in white. (B) Heat map showing the expression levels of transcripts involved in GABA metabolism  
505 in Col-0 plants subjected HL, HS and HL+HS combination. Non-significant expression levels  
506 compared to controls are shown in grey. Transcript expression data was obtained from the RNA-  
507 Seq analysis conducted by Balfagón et al. (2019) (Table S4). *Abbreviations used:* ALDH5F1,  
508 aldehyde dehydrogenase 5F1; GABA,  $\gamma$ -aminobutyric acid; GAD, glutamate decarboxylase; HL,  
509 high light; HS, heat stress; HL+HS, a combination of high light and heat stress; POP2, pollen-  
510 pistil incompatibility 2.

511 **Fig. 5.** Involvement of GABA in the response of Arabidopsis plants to high light, heat stress and  
512 their combination. (A) Representative images of Col-0 and the GABA mutant *gad3* (two  
513 independent knockout lines; SALK\_138534C and SALK\_033307C) subjected to high light (HL),  
514 heat stress (HS) and a combination of HL and HS (HL+HS). (B) Levels of GABA in Col-0 and  
515 the GABA knockout mutant *gad3* (two independent lines) subjected to HL, HS and HL+HS  
516 combination. (C) Survival of Col-0 and the GABA mutant *gad3* (two independent lines) subjected  
517 to HL, HS and HL+HS combination. (D) Leaf Damage Index (LDI) of Col-0 and the GABA  
518 mutant *gad3* (two independent lines) subjected to HL, HS and HL+HS combination. Asterisks  
519 denote Student's t-test significance at  $p < 0.05$  compared to wild type (C) or to control (B and D).  
520 Error bars represent SD. *Abbreviations used:* CT, control; GAD, glutamate decarboxylase; HL,  
521 high light; HS, heat stress; HL+HS, a combination of high light and heat stress; LDI, Leaf Damage  
522 Index.

523

524

525 **REFERECES**

- 526 **Alcázar R, Altabella T, Marco F, Bortolotti C, Reymond M, Koncz C, Carrasco P, Tiburcio**  
527 **AF** (2010) Polyamines: Molecules with regulatory functions in plant abiotic stress tolerance.  
528 *Planta* **231**: 1237–1249
- 529 **Aleksza D, Horváth G V., Sándor G, Szabados L** (2017) Proline accumulation is regulated by  
530 transcription factors associated with phosphate starvation. *Plant Physiol* **175**: 555–567
- 531 **Amir R** (2010) Current understanding of the factors regulating methionine content in vegetative  
532 tissues of higher plants. *Amino Acids* **39**: 917–931
- 533 **Asada K** (2006) Production and Scavenging of Reactive Oxygen Species in Chloroplasts and  
534 Their Functions. *Plant Physiol* **141**: 391–396
- 535 **Balfagón D, Sengupta S, Gómez-Cadenas A, Fritschi FBFB, Azad R, Mittler R, Zandalinas**  
536 **SISI** (2019) Jasmonic acid is required for plant acclimation to a combination of high light  
537 and heat stress. *Plant Physiol* **181**: 1668–1682
- 538 **Balfagón D, Zandalinas SI, Mittler R, Gómez-Cadenas A** (2020) High temperatures modify  
539 plant responses to abiotic stress conditions. *Physiol Plant* doi:10.1111/ppl.13151
- 540 **Batista-Silva W, Heinemann B, Rugen N, Nunes-Nesi A, Araújo WL, Braun H, Hildebrandt**  
541 **TM** (2019) The role of amino acid metabolism during abiotic stress release. *Plant Cell*  
542 *Environ* **42**: 1630–1644
- 543 **Bouché N, Fromm H** (2004) GABA in plants: Just a metabolite? *Trends Plant Sci* **9**: 110–115
- 544 **Caldana C, Degenkolbe T, Cuadros-Inostroza A, Klie S, Sulpice R, Lisse A, Steinhauser D,**  
545 **Fernie AR, Willmitzer L, Hannah MA** (2011) High-density kinetic analysis of the  
546 metabolomic and transcriptomic response of Arabidopsis to eight environmental conditions.  
547 *Plant J* **67**: 869–884
- 548 **Cramer GR, Ergül A, Grimplet J, Tillett RL, Tattersall EAR, Bohlman MC, Vincent D,**  
549 **Sonderegger J, Evans J, Osborne C, et al** (2007) Water and salinity stress in grapevines:  
550 Early and late changes in transcript and metabolite profiles. *Funct Integr Genomics* **7**: 111–  
551 134

- 552 **Czarnocka W, Karpiński S** (2018) Friend or foe? Reactive oxygen species production,  
553 scavenging and signaling in plant response to environmental stresses. *Free Radic Biol Med*  
554 **122**: 4–20
- 555 **Devireddy AR, Zandalinas SI, Gómez-Cadenas A, Blumwald E, Mittler R** (2018)  
556 Coordinating the overall stomatal response of plants: Rapid leaf-to-leaf communication  
557 during light stress. *Sci Signal* **11**: 518
- 558 **Dietz K-J** (2015) Efficient high light acclimation involves rapid processes at multiple mechanistic  
559 levels. *J Exp Bot* **66**: 2401–2414
- 560 **Forde BG, Lea PJ** (2007) Glutamate in plants: Metabolism, regulation, and signalling. *J Exp Bot*  
561 **58**: 2339–2358
- 562 **Fromm H** (2020) GABA signaling in plants: targeting the missing pieces of the puzzle. *J Exp Bot*  
563 **71**: 6238–6245
- 564 **Gallas G, Waters ER** (2015) *Boechera* species exhibit species-specific responses to combined  
565 heat and high light stress. *PLoS One* **10**: e0129041
- 566 **Hewezi T, Léger M, Gentzbittel L** (2008) A comprehensive analysis of the combined effects of  
567 high light and high temperature stresses on gene expression in sunflower. *Ann Bot* **102**: 127–  
568 140
- 569 **Huang T, Jander G** (2017) Abscisic acid-regulated protein degradation causes osmotic stress-  
570 induced accumulation of branched-chain amino acids in *Arabidopsis thaliana*. *Planta* **246**:  
571 737–747
- 572 **Kaplan F, Kopka J, Haskell DW, Zhao W, Schiller KC, Gatzke N, Sung DY, Guy CL** (2004)  
573 Exploring the temperature-stress metabolome of *Arabidopsis*. *Plant Physiol* **136**: 4159–4168
- 574 **Kempa S, Krasensky J, Dal Santo S, Kopka J, Jonak C** (2008) A Central Role of Abscisic Acid  
575 in Stress-Regulated Carbohydrate Metabolism. *PLoS One* **3**: e3935
- 576 **Krasensky J, Jonak C** (2012) Drought, salt, and temperature stress-induced metabolic  
577 rearrangements and regulatory networks. *J Exp Bot* **63**: 1593–1608
- 578 **Li Z, Wakao S, Fischer BB, Niyogi KK** (2009) Sensing and responding to excess light. *Annu*

- 579 Rev Plant Biol **60**: 239–260
- 580 **Li Z, Yu J, Peng Y, Huang B** (2016) Metabolic pathways regulated by  $\gamma$ -aminobutyric acid  
581 (GABA) contributing to heat tolerance in creeping bentgrass (*Agrostis stolonifera*). *Sci Rep*  
582 **6**: 30338
- 583 **Lugan R, Niogret M-FF, Leport L, Guégan J-PP, Larher FR, Savouré A, Kopka J,**  
584 **Bouchereau A** (2010) Metabolome and water homeostasis analysis of *Thellungiella*  
585 *salsuginea* suggests that dehydration tolerance is a key response to osmotic stress in this  
586 halophyte. **64**: 215–229
- 587 **Maruyama K, Takeda M, Kidokoro S, Yamada K, Sakuma Y, Urano K, Fujita M,**  
588 **Yoshiwara K, Matsukura S, Morishita Y, et al** (2009) Metabolic pathways involved in  
589 cold acclimation identified by integrated analysis of metabolites and transcripts regulated by  
590 DREB1A and DREB2A. *Plant Physiol* **150**: 1972–1980
- 591 **Mathur S, Agrawal D, Jajoo A** (2014) Photosynthesis: Response to high temperature stress. *J*  
592 *Photochem Photobiol B Biol* **137**: 116–126
- 593 **Mittler R** (2006) Abiotic stress, the field environment and stress combination. *Trends Plant Sci*  
594 **11**: 15–19
- 595 **Murchie EH, Ruban A V.** (2020) Dynamic non-photochemical quenching in plants: from  
596 molecular mechanism to productivity. *Plant J* **101**: 885–896
- 597 **Obata T, Witt S, Lisec J, Palacios-Rojas N, Florez-Sarasa I, Yousfi S, Araus JL, Cairns JE,**  
598 **Fernie AR** (2015) Metabolite profiles of maize leaves in drought, heat, and combined stress  
599 field trials reveal the relationship between metabolism and grain yield. *Plant Physiol* **169**:  
600 2665–2683
- 601 **Ort DR** (2001) When there is too much light. *Plant Physiol* **125**: 29–32
- 602 **Priya M, Sharma L, Kaur R, Bindumadhava H, Nair RM, Siddique KHM, Nayyar H** (2019)  
603 GABA ( $\gamma$ -aminobutyric acid), as a thermo-protectant, to improve the reproductive function  
604 of heat-stressed mungbean plants. *Sci Rep* **9**: 1–14
- 605 **Rizhsky L, Liang H, Mittler R** (2002) The combined effect of drought stress and heat shock on

- 606 gene expression in tobacco. *Plant Physiol* **130**: 1143–1151
- 607 **Rizhsky L, Liang H, Shuman J, Shulaev V, Davletova S, Mittler R** (2004) When defense  
608 pathways collide. The response of *Arabidopsis* to a combination of drought and heat stress.  
609 *Plant Physiol* **134**: 1683–1696
- 610 **Roeber VM, Bajaj I, Rohde M, Schmülling T, Cortleven A** (2020) Light acts as a stressor and  
611 influences abiotic and biotic stress responses in plants. *Plant Cell Environ* pce.13948
- 612 **Ruban A V.** (2015) Evolution under the sun: optimizing light harvesting in photosynthesis. *J Exp*  
613 *Bot* **66**: 7–23
- 614 **Salvatierra A, Pimentel P, Almada R, Hinrichsen P** (2016) Exogenous GABA application  
615 transiently improves the tolerance to root hypoxia on a sensitive genotype of *Prunus*  
616 rootstock. *Environ Exp Bot* **125**: 52–66
- 617 **Sanchez DH, Siahpoosh MR, Roessner U, Udvardi M, Kopka J** (2008) Plant metabolomics  
618 reveals conserved and divergent metabolic responses to salinity. *Physiol Plant* **132**: 209–219
- 619 **Seifikalhor M, Aliniaiefard S, Bernard F, Seif M, Latifi M, Hassani B, Didaran F, Bosacchi**  
620 **M, Rezadoost H, Li T** (2020)  $\gamma$ -Aminobutyric acid confers cadmium tolerance in maize  
621 plants by concerted regulation of polyamine metabolism and antioxidant defense systems. *Sci*  
622 *Rep* **10**: 3356
- 623 **Seifikalhor M, Aliniaiefard S, Hassani B, Niknam V, Lastochkina O** (2019) Diverse role of  $\gamma$ -  
624 aminobutyric acid in dynamic plant cell responses. *Plant Cell Rep* **38**: 847–867
- 625 **Shaar-Moshe L, Hayouka R, Roessner U, Peleg Z** (2019) Phenotypic and metabolic plasticity  
626 shapes life-history strategies under combinations of abiotic stresses. *Plant Direct* **3**: e00113
- 627 **Shang H, Cao S, Yang Z, Cai Y, Zheng Y** (2011) Effect of exogenous  $\gamma$ -aminobutyric acid  
628 treatment on proline accumulation and chilling injury in peach fruit after long-term cold  
629 storage. *J Agric Food Chem* **59**: 1264–1268
- 630 **Shelp BJ, Bozzo GG, Trobacher CP, Zarei A, Deyman KL, Brikis CJ** (2012)  
631 Hypothesis/review: Contribution of putrescine to 4-aminobutyrate (GABA) production in  
632 response to abiotic stress. *Plant Sci* **193–194**: 130–135

- 633 **Shi SQ, Shi Z, Jiang ZP, Qi LW, Sun XM, Li CX, Liu JF, Xiao WF, Zhang SG** (2010) Effects  
634 of exogenous GABA on gene expression of *Caragana intermedia* roots under NaCl stress:  
635 Regulatory roles for H<sub>2</sub>O<sub>2</sub> and ethylene production. *Plant, Cell Environ* **33**: 149–162
- 636 **Signorelli S, Tarkowski LP, Van den Ende W, Bassham DC** (2019) Linking Autophagy to  
637 Abiotic and Biotic Stress Responses. *Trends Plant Sci* **24**: 413–430
- 638 **Spicher L, Almeida J, Gutbrod K, Pipitone R, Dörmann P, Glauser G, Rossi M, Kessler F**  
639 (2017) Essential role for phytol kinase and tocopherol in tolerance to combined light and  
640 temperature stress in tomato. *J Exp Bot* **68**: 5845–5856
- 641 **Suzuki N, Rivero RM, Shulaev V, Blumwald E, Mittler R** (2014) Abiotic and biotic stress  
642 combinations. *New Phytol* **203**: 32–43
- 643 **Szabados L, Savouré A** (2010) Proline: a multifunctional amino acid. *Trends Plant Sci* **15**: 89–  
644 97
- 645 **Thalmann M, Santelia D** (2017) Starch as a determinant of plant fitness under abiotic stress. *New*  
646 *Phytol* **214**: 943–951
- 647 **Tzin V, Galili G** (2010) New Insights into the shikimate and aromatic amino acids biosynthesis  
648 pathways in plants. *Mol Plant* **3**: 956–972
- 649 **Urano K, Kurihara Y, Seki M, Shinozaki K** (2010) “Omics” analyses of regulatory networks in  
650 plant abiotic stress responses. *Curr Opin Plant Biol* **13**: 132–138
- 651 **Usadel B, Bläsing OE, Gibon Y, Poree F, Höhne M, Günter M, Trethewey R, Kamlage B,**  
652 **Poorter H, Stitt M** (2008) Multilevel genomic analysis of the response of transcripts, enzyme  
653 activities and metabolites in *Arabidopsis* rosettes to a progressive decrease of temperature in  
654 the non-freezing range. *Plant, Cell Environ* **31**: 518–547
- 655 **Yamamoto Y, Aminaka R, Yoshioka M, Khatoon M, Komayama K, Takenaka D, Yamashita**  
656 **A, Nijo N, Inagawa K, Morita N, et al** (2008) Quality control of photosystem II: impact of  
657 light and heat stresses. *Photosynth Res* **98**: 589–608
- 658 **Yu GH, Zou J, Feng J, Peng XB, Wu JY, Wu YL, Palanivelu R, Sun MX** (2014) Exogenous  
659  $\gamma$ -aminobutyric acid (GABA) affects pollen tube growth via modulating putative Ca<sup>2+</sup>-



660 permeable membrane channels and is coupled to negative regulation on glutamate  
661 decarboxylase. *J Exp Bot* **65**: 3235–3248

662 **Zandalinas S, Sales C, Beltrán J, Gómez-Cadenas A, Arbona V** (2016) Activation of  
663 Secondary Metabolism in Citrus Plants Is Associated to Sensitivity to Combined Drought and  
664 High Temperatures. *Front Plant Sci* **7**: 1954

665 **Zanor MI, Rambla J-LL, Chaïb J, Steppa A, Medina A, Granell A, Fernie AR, Causse M**  
666 (2009) Metabolic characterization of loci affecting sensory attributes in tomato allows an  
667 assessment of the influence of the levels of primary metabolites and volatile organic contents.  
668 *J Exp Bot* **60**: 2139–2154

669

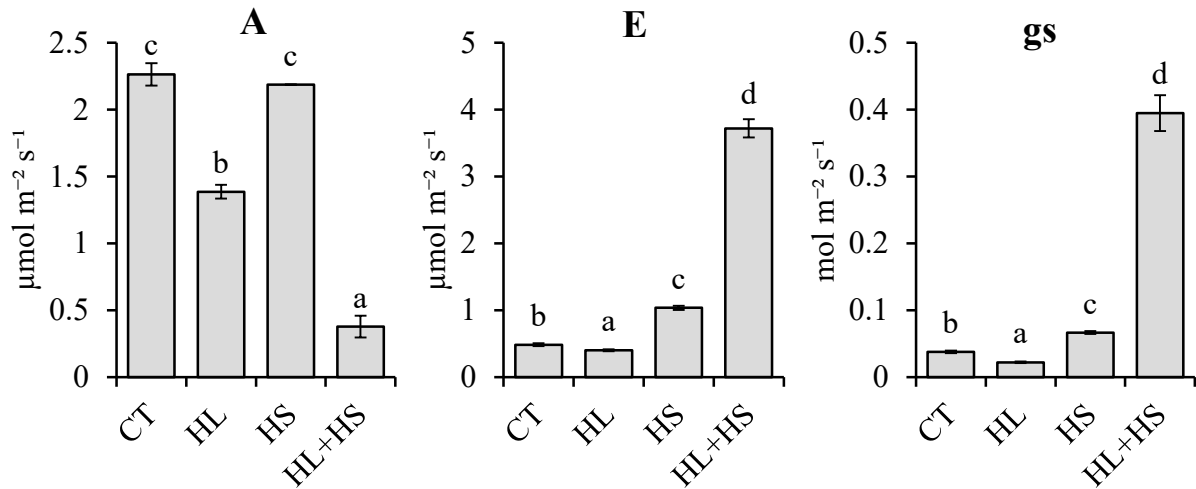

**Fig. 1.** Physiological measurements of Arabidopsis plants subjected to high light, heat stress and their combination. Leaf photosynthetic rate (A), transpiration (E), and stomatal conductance (gs) of Col-0 plants subjected to high light (HL), heat stress (HS) and the combination of HL and HS (HL+HS). Error bars represent SD (N=9). Different letters denote statistical significance at  $p < 0.05$ . *Abbreviations used:* A, photosynthetic rate; E, transpiration; gs, stomatal conductance; CT, control; HL, high light; HS, heat stress; HL+HS, a combination of high light and heat stress.

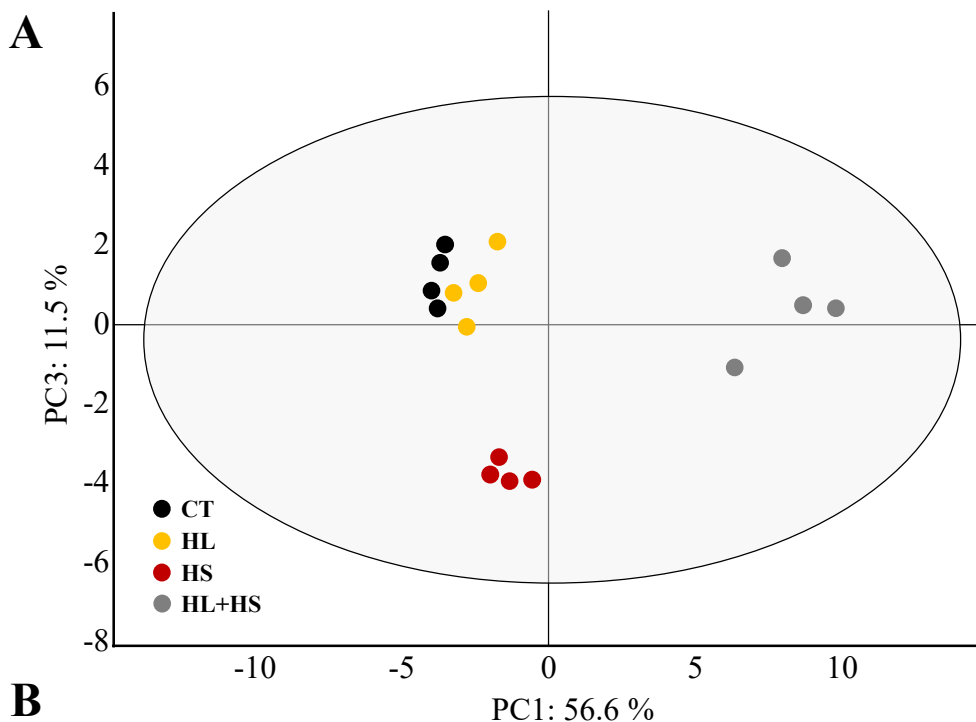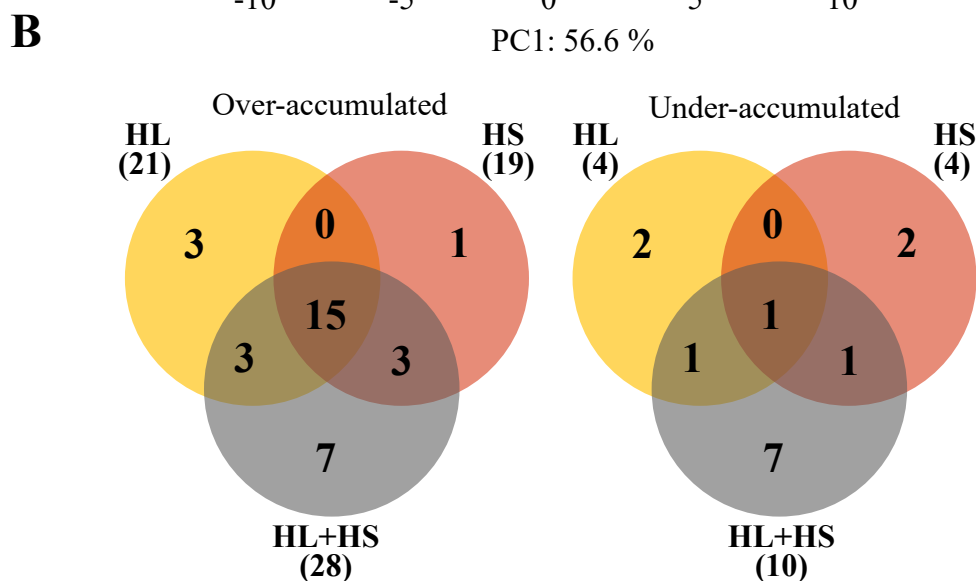

**Fig. 2.** Metabolic analysis of *Arabidopsis* Col-0 plants subjected to high light, heat stress and their combination. (A) Principal Component Analysis (PCA) score plot of metabolite profiles obtained from control Col-0 plants (CT), and Col-0 plants subjected to high light (HL), heat stress (HS) or a combination of HL and HS (HL+HS). (B) Venn diagrams showing the overlap between metabolites over-accumulated (left) or under-accumulated (right) in response to HL, HS and HL+HS combination. *Abbreviations used:* CT, control; HL, high light; HS, heat stress; HL+HS, a combination of high light and heat stress.

A

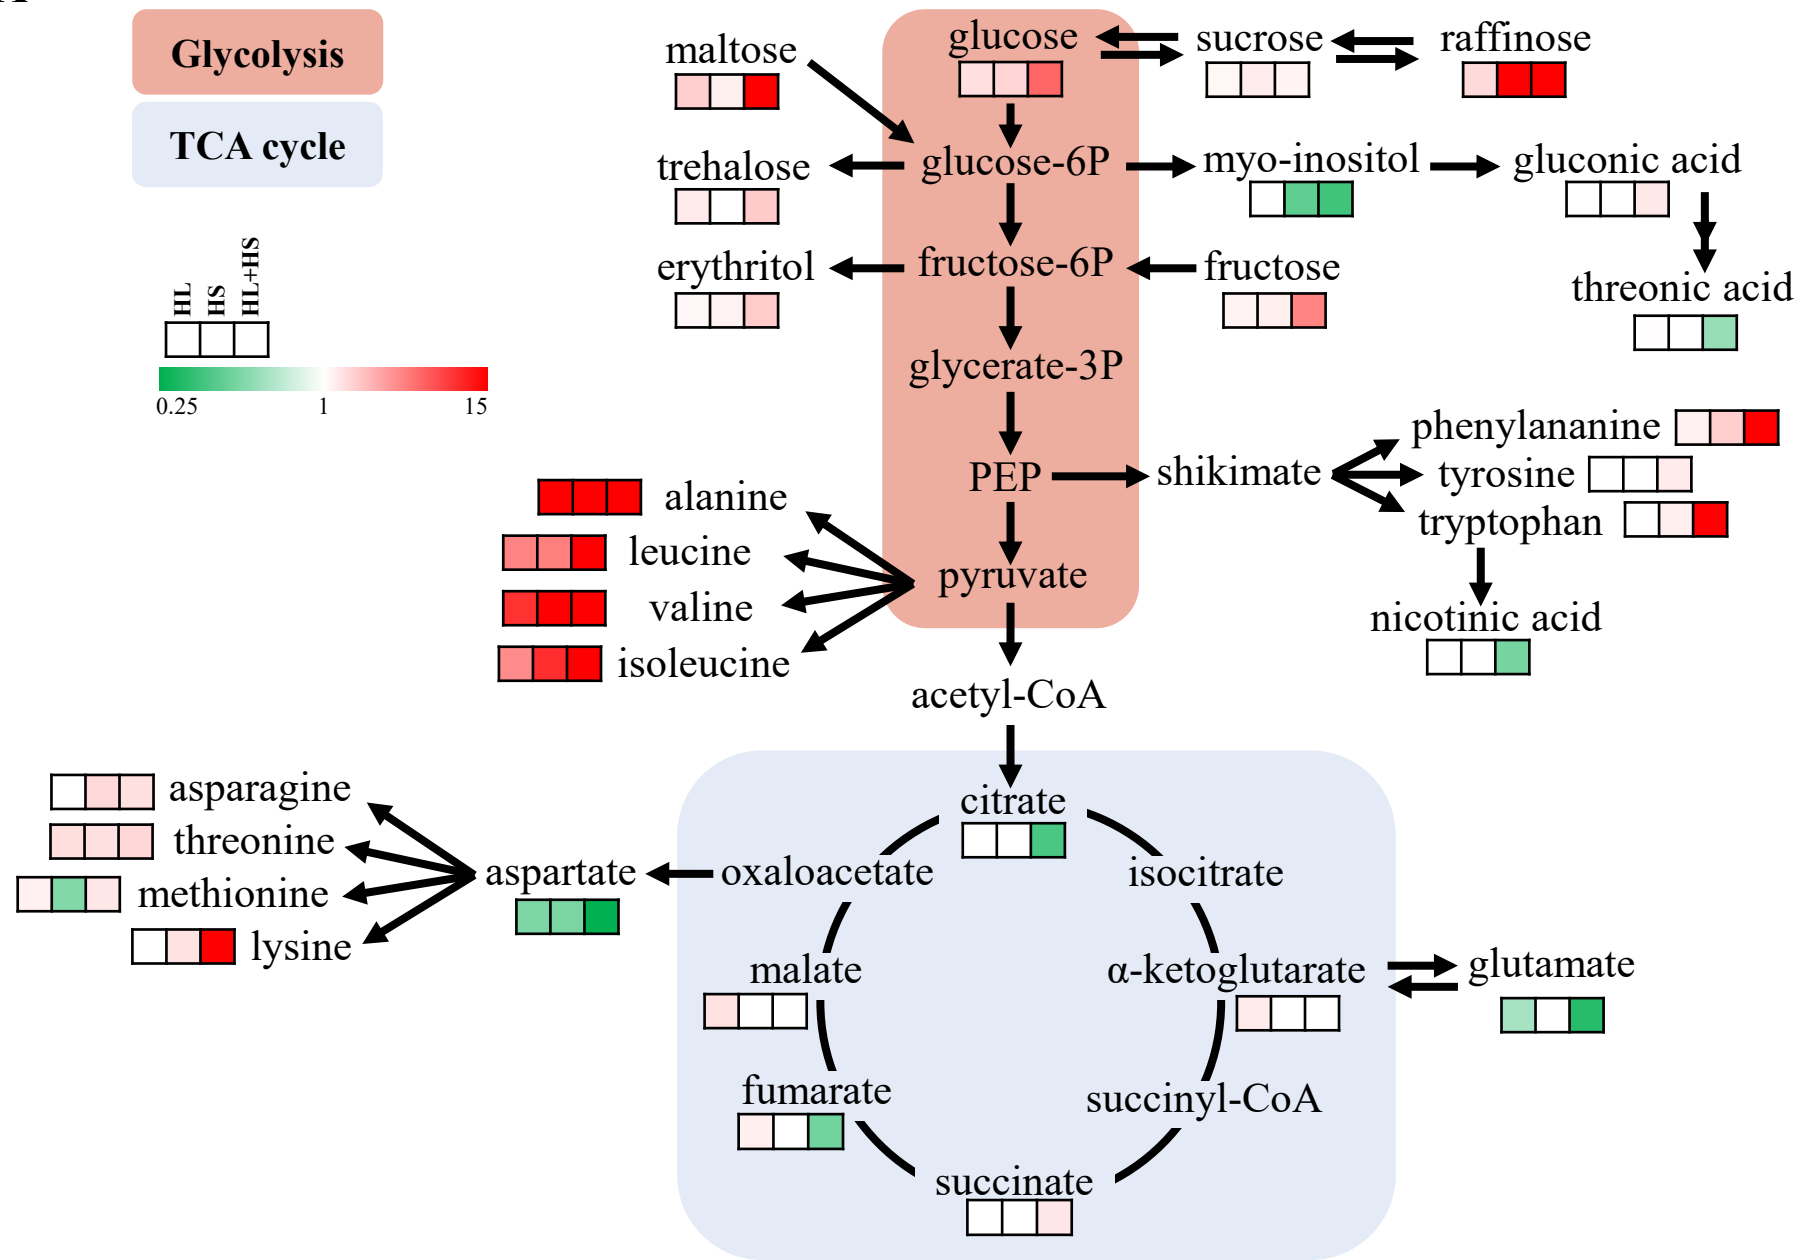

B

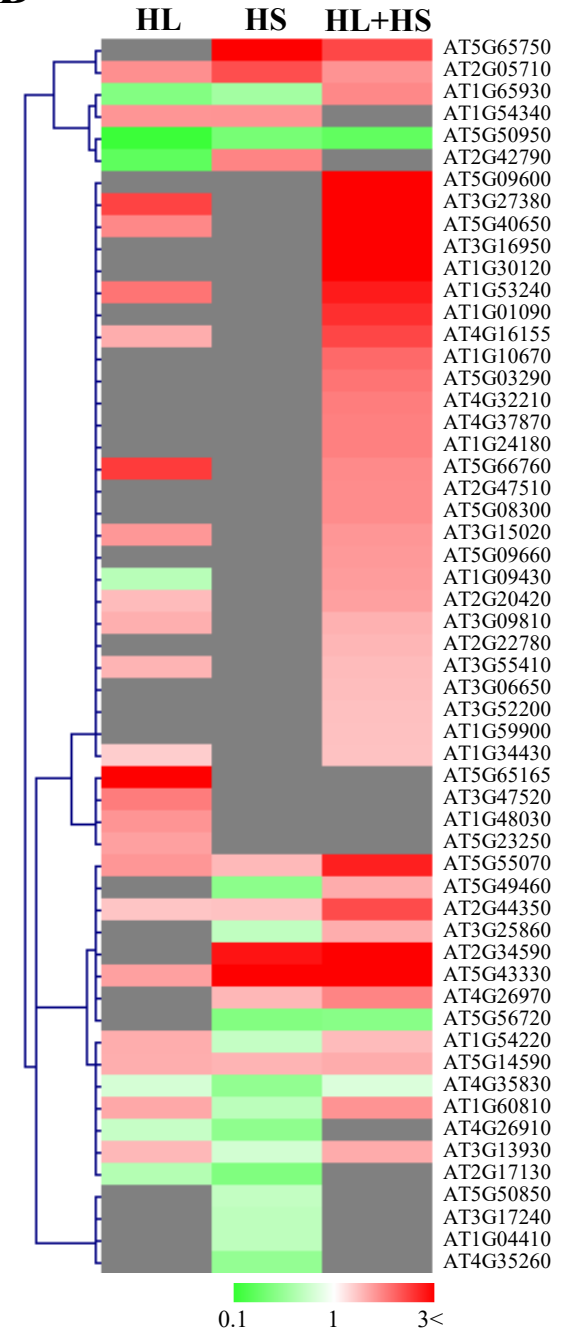

**Fig. 3.** Levels of amino acids and metabolites involved in glycolysis and TCA cycle in *Arabidopsis* plants subjected to high light, heat stress and their combination. (A) Levels of metabolites participating in glycolysis, TCA cycle, and amino acid metabolism in Col-0 plants subjected to high light (HL), heat stress (HS) or a combination of HL and HS (HL+HS). Significant metabolite levels ( $p < 0.05$ ) are expressed as fold change compared to control conditions and are shown as a color scale (Table S1). Non-significant accumulation compared to control is shown in white. (B) Heat map showing the expression levels of transcripts involved in TCA cycle in Col-0 plants subjected HL, HS and HL+HS combination. Significant transcript levels ( $p < 0.05$ ) are expressed as fold change compared to control conditions and are shown as a color scale. Non-significant expression levels compared to control are shown in grey. Transcript expression data was obtained from the RNA-Seq analysis conducted by Balfagón et al. (2019) (Table S2). *Abbreviations used:* HL, high light; HS, heat stress; HL+HS, a combination of high light and heat stress; PEP, phosphoenolpyruvate.

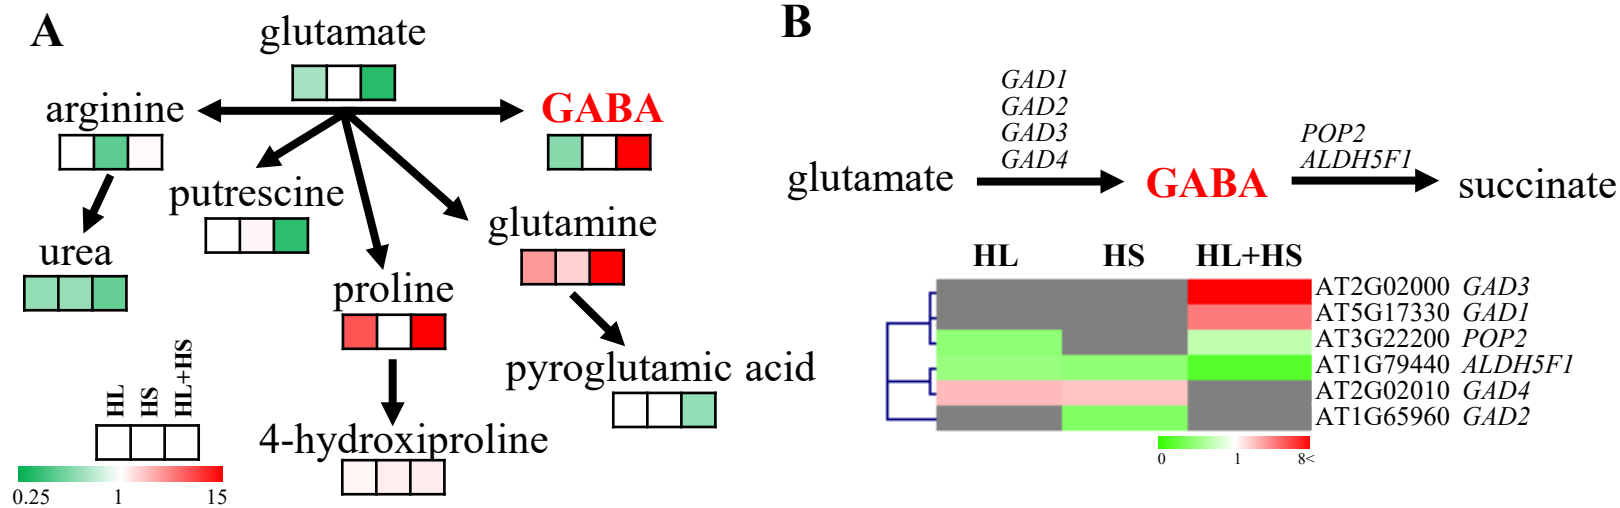

**Fig. 4.** Glutamate metabolism in Arabidopsis plants subjected to high light, heat stress and their combination. (A) Level of metabolites involved in glutamate metabolism in Col-0 plants subjected to high light (HL), heat stress (HS) or a combination of HL and HS (HL+HS). Significant metabolite levels ( $p < 0.05$ ) are expressed as fold change compared to control conditions and are shown as a color scale (Table S3). Non-significant accumulation compared to controls are shown in white. (B) Heat map showing the expression levels of transcripts involved in GABA metabolism in Col-0 plants subjected HL, HS and HL+HS combination. Non-significant expression levels compared to controls are shown in grey. Transcript expression data was obtained from the RNA-Seq analysis conducted by Balfagón et al. (2019) (Table S4). *Abbreviations used:* ALDH5F1, aldehyde dehydrogenase 5F1; GABA,  $\gamma$ -aminobutyric acid; GAD, glutamate decarboxylase; HL, high light; HS, heat stress; HL+HS, a combination of high light and heat stress; POP2, pollen-pistil incompatibility 2.

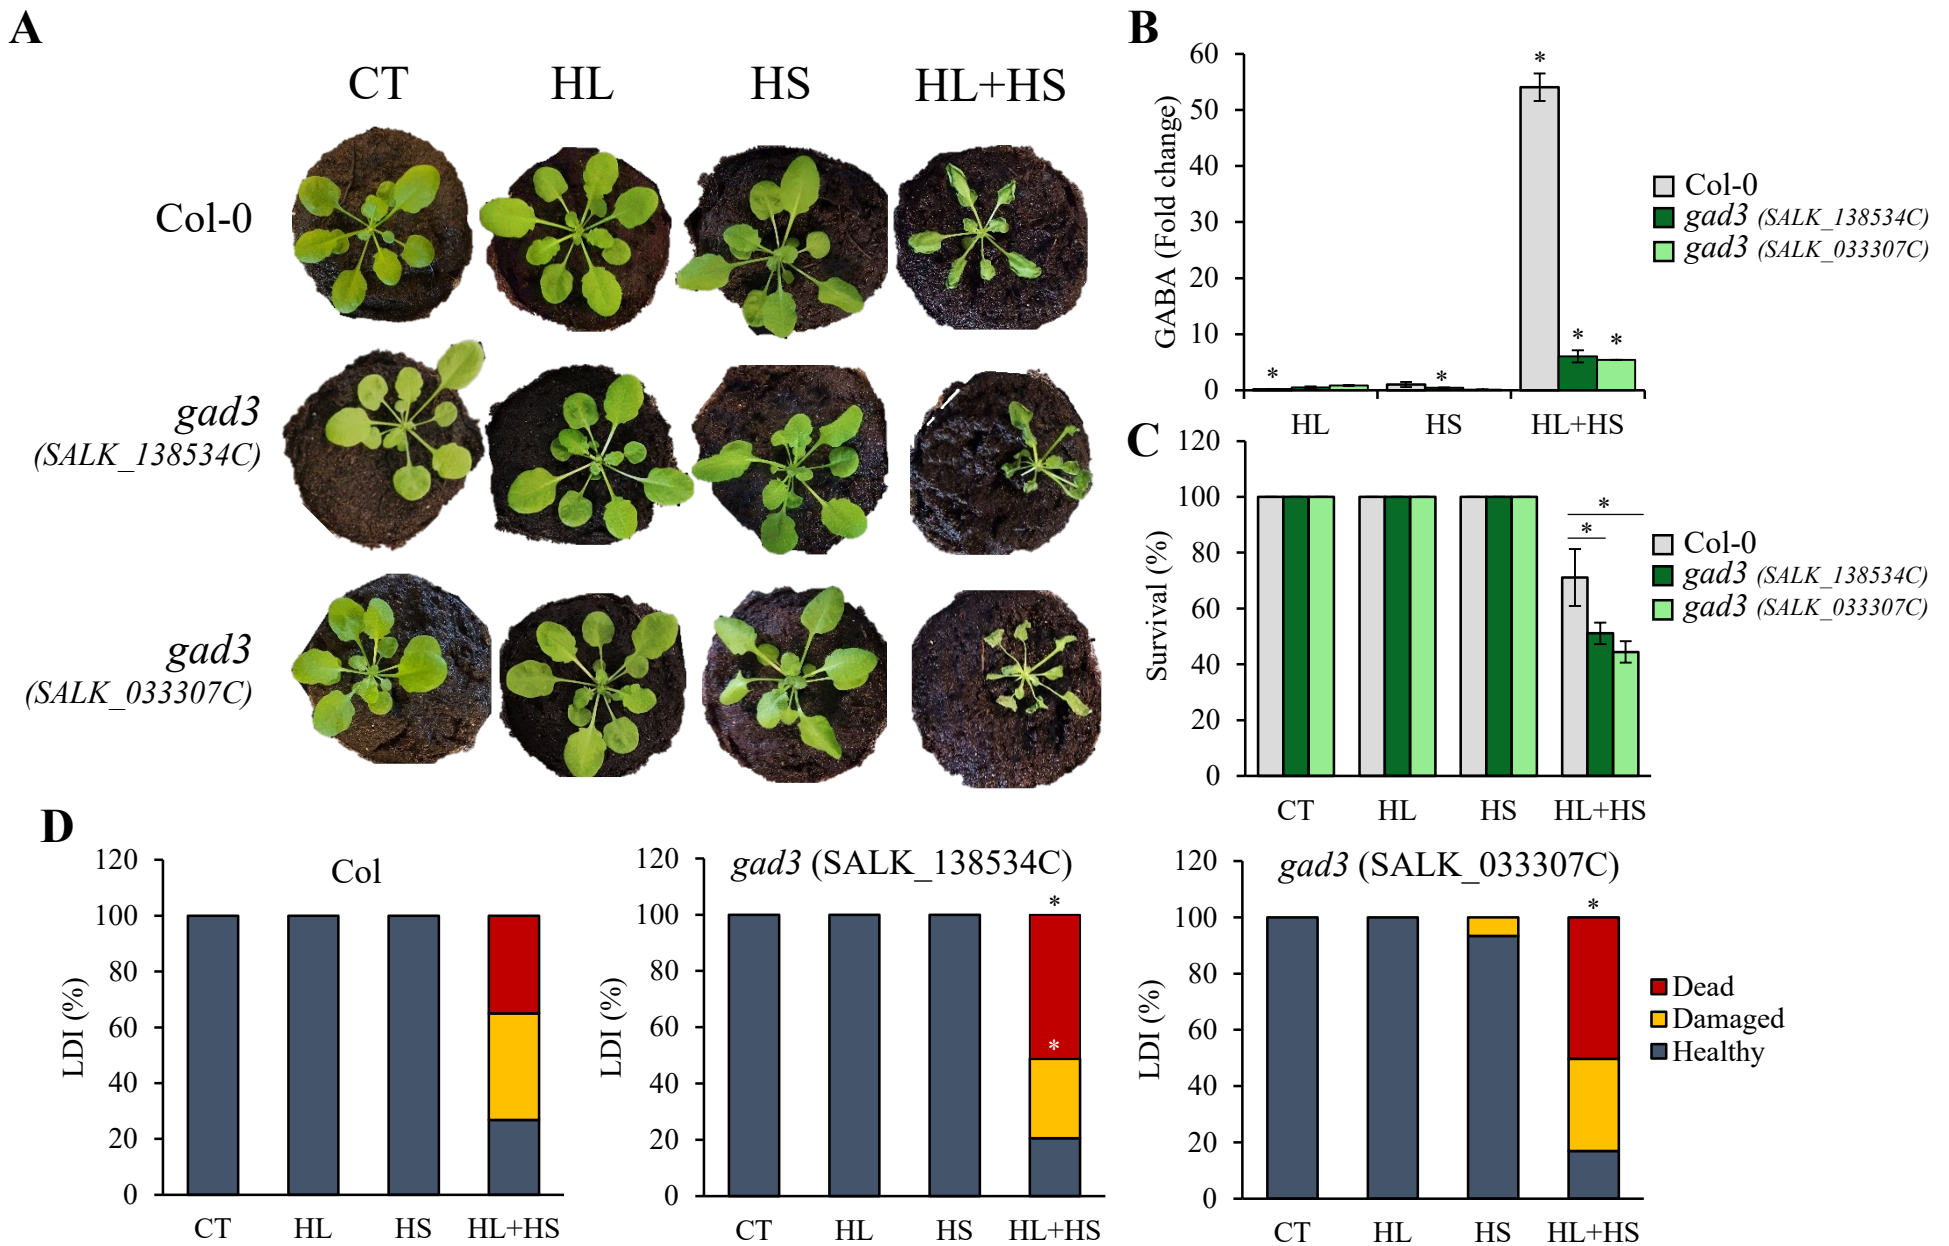

**Fig. 5.** Involvement of GABA in the response of *Arabidopsis* plants to high light, heat stress and their combination. (A) Representative images of Col-0 and the GABA mutant *gad3* (two independent knockout lines; SALK\_138534C and SALK\_033307C) subjected to high light (HL), heat stress (HS) and a combination of HL and HS (HL+HS). (B) Levels of GABA in Col-0 and the GABA knockout mutant *gad3* (two independent lines) subjected to HL, HS and HL+HS combination. (C) Survival of Col-0 and the GABA mutant *gad3* (two independent lines) subjected to HL, HS and HL+HS combination. (D) Leaf Damage Index (LDI) of Col-0 and the GABA mutant *gad3* (two independent lines) subjected to HL, HS and HL+HS combination. Asterisks denote Student's t-test significance at  $p < 0.05$  compared to wild type (C) or to control (B and D). Error bars represent SD. *Abbreviations used:* CT, control; GAD, glutamate decarboxylase; HL, high light; HS, heat stress; HL+HS, a combination of high light and heat stress; LDI, Leaf Damage Index.
